# Supplementary material for: Inhibition of myeloid-derived suppressor cell arginase-1 production enhances T-cell-based immunotherapy against Cryptococcus neoformans infection
Source: PubMed Central journal article supplement (PMC9283461; doi:10.1038/s41467-022-31723-4), 2022-07-14
Supplement: 41467_2022_31723_MOESM1_ESM.pdf [file 41467_2022_31723_MOESM1_ESM.pdf]

# SUPPLEMENTARY INFORMATION

Supplementary Figure 1

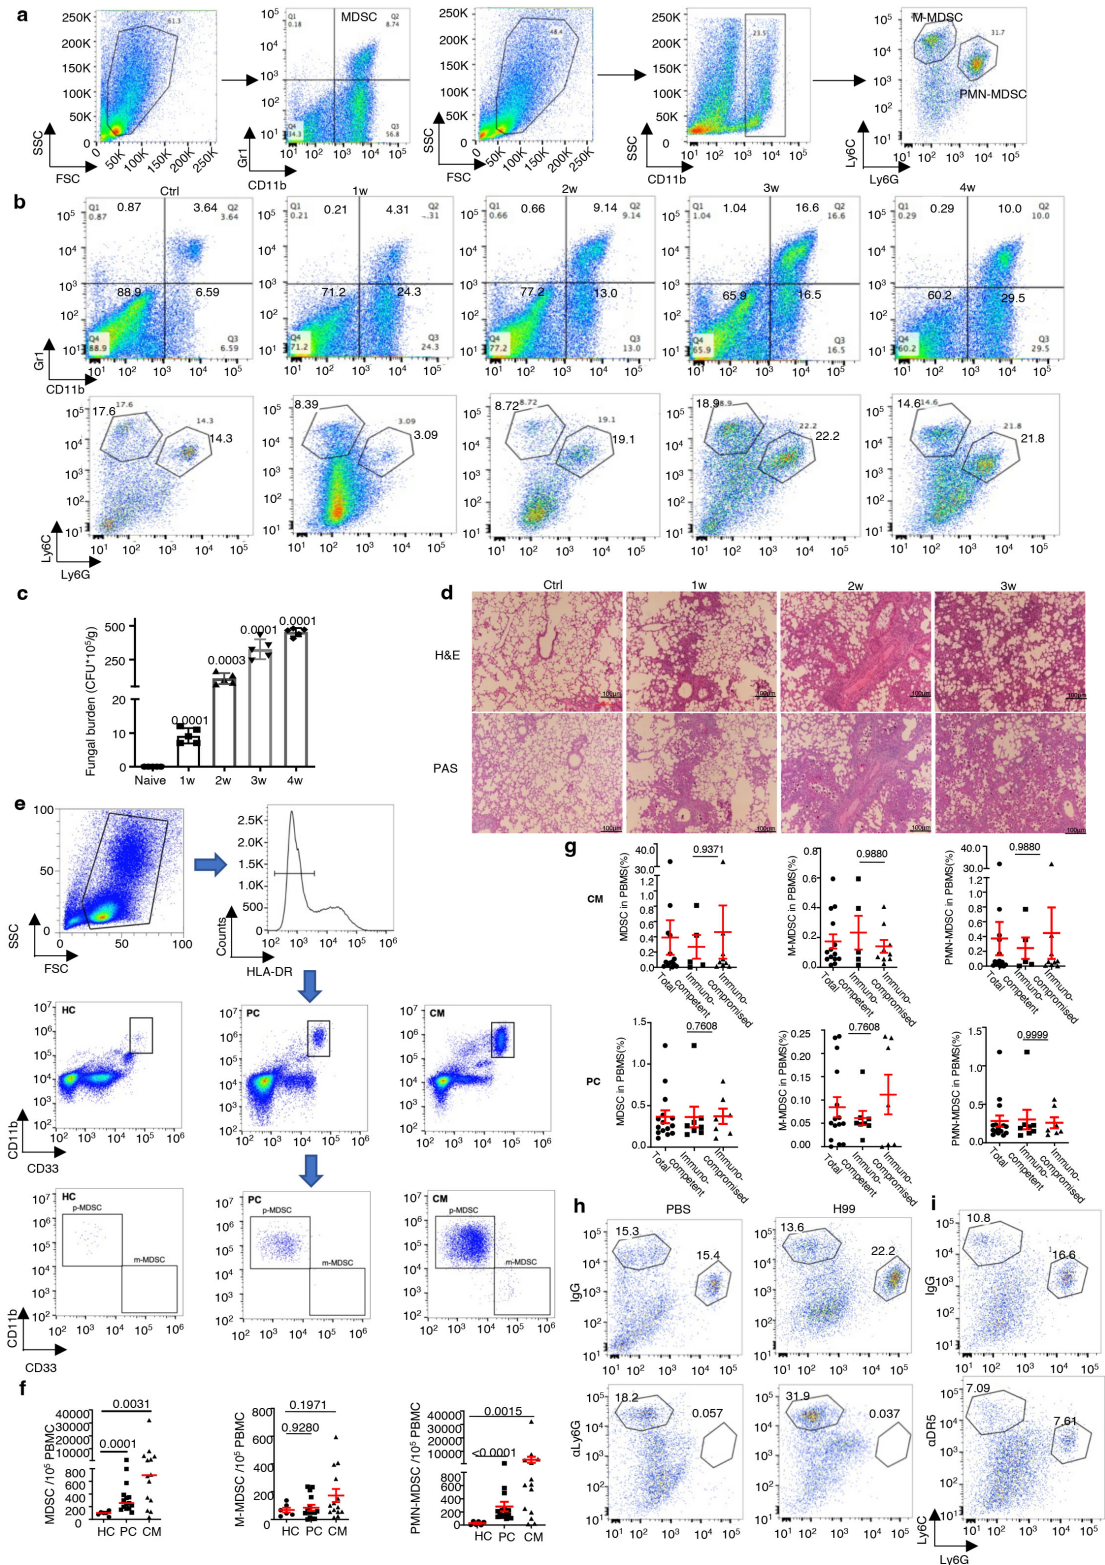

**Supplementary Figure 1. *C. neoformans* infection induces the recruitment of MDSCs, especially PMN-MDSCs, to exert deleterious effects.** (a) Gating strategy of CD11b<sup>+</sup>Gr1<sup>+</sup>MDSCs, CD11b<sup>+</sup>Ly6G<sup>+</sup>Ly6C<sup>low</sup> M-MDSCs and CD11b<sup>+</sup>Ly6G<sup>+</sup>Ly6C<sup>high</sup> PMN-MDSCs among lung cells. (b) Representative flow charts of MDSCs, M-MDSCs and PMN-MDSCs in mice without (Ctrl) or with intratracheal infection of *C. neoformans* strain H99 (1×10<sup>3</sup> CFU/mouse) for the indicated weeks (w). (c-d) Fungal burden (c) and representative histological images with hematoxylin-eosin (H&E) and Periodic Acid-Schiff (PAS) staining (d) of the lung in mice at indicated weeks (w) post H99 infection were compared with non-infected group (Ctrl). Scale bars = 100µm. (e) Gating strategy and representative charts of human MDSCs (HLA-DR<sup>-</sup>CD11b<sup>+</sup>CD33<sup>+</sup>), M-MDSCs (HLA-DR<sup>-</sup>CD11b<sup>+</sup>CD33<sup>+</sup>CD15<sup>-</sup>CD14<sup>+</sup>) and PMN-MDSCs (HLA-DR<sup>-</sup>CD11b<sup>+</sup>CD33<sup>+</sup>CD15<sup>+</sup>CD14<sup>-</sup>) in peripheral blood mononuclear cells (PBMCs) of healthy control (HC), pulmonary cryptococcosis (PC) or cryptococcal meningitis (CM) patients. (f) Numbers of MDSCs, M-MDSCs and PMN-MDSCs in 10<sup>5</sup> PBMCs of healthy controls (HC, n=6), and patients with pulmonary cryptococcosis (PC, n=15) or cryptococcal meningitis (CM, n=14) were counted. (g) Frequency of MDSC, PMN-MDSCs and M-MDSCs in PBMCs of total, immunocompetent or immunocompromised patients with pulmonary cryptococcosis (PC) and cryptococcal meningitis (CM), respectively. (h) Representative flow charts of M-/PMN-MDSCs from H99-infected mice, which were intraperitoneally treated with anti-Ly6G antibody (αLy6G) or control IgG twice a week, **related to Fig 1e**. (i) Representative flow charts of M-/PMN-MDSCs in lungs from mice with intraperitoneal injection of anti-DR5 antibody (αDR5) or control IgG twice a week, **related to Fig 1i**. Data were presented as mean ± SEM, n=5 biologically independent samples (c). Data were analyzed by unpaired two-sided Student's t test in c, f, g. Source data are provided as a Source Data file.

Supplementary Figure 2

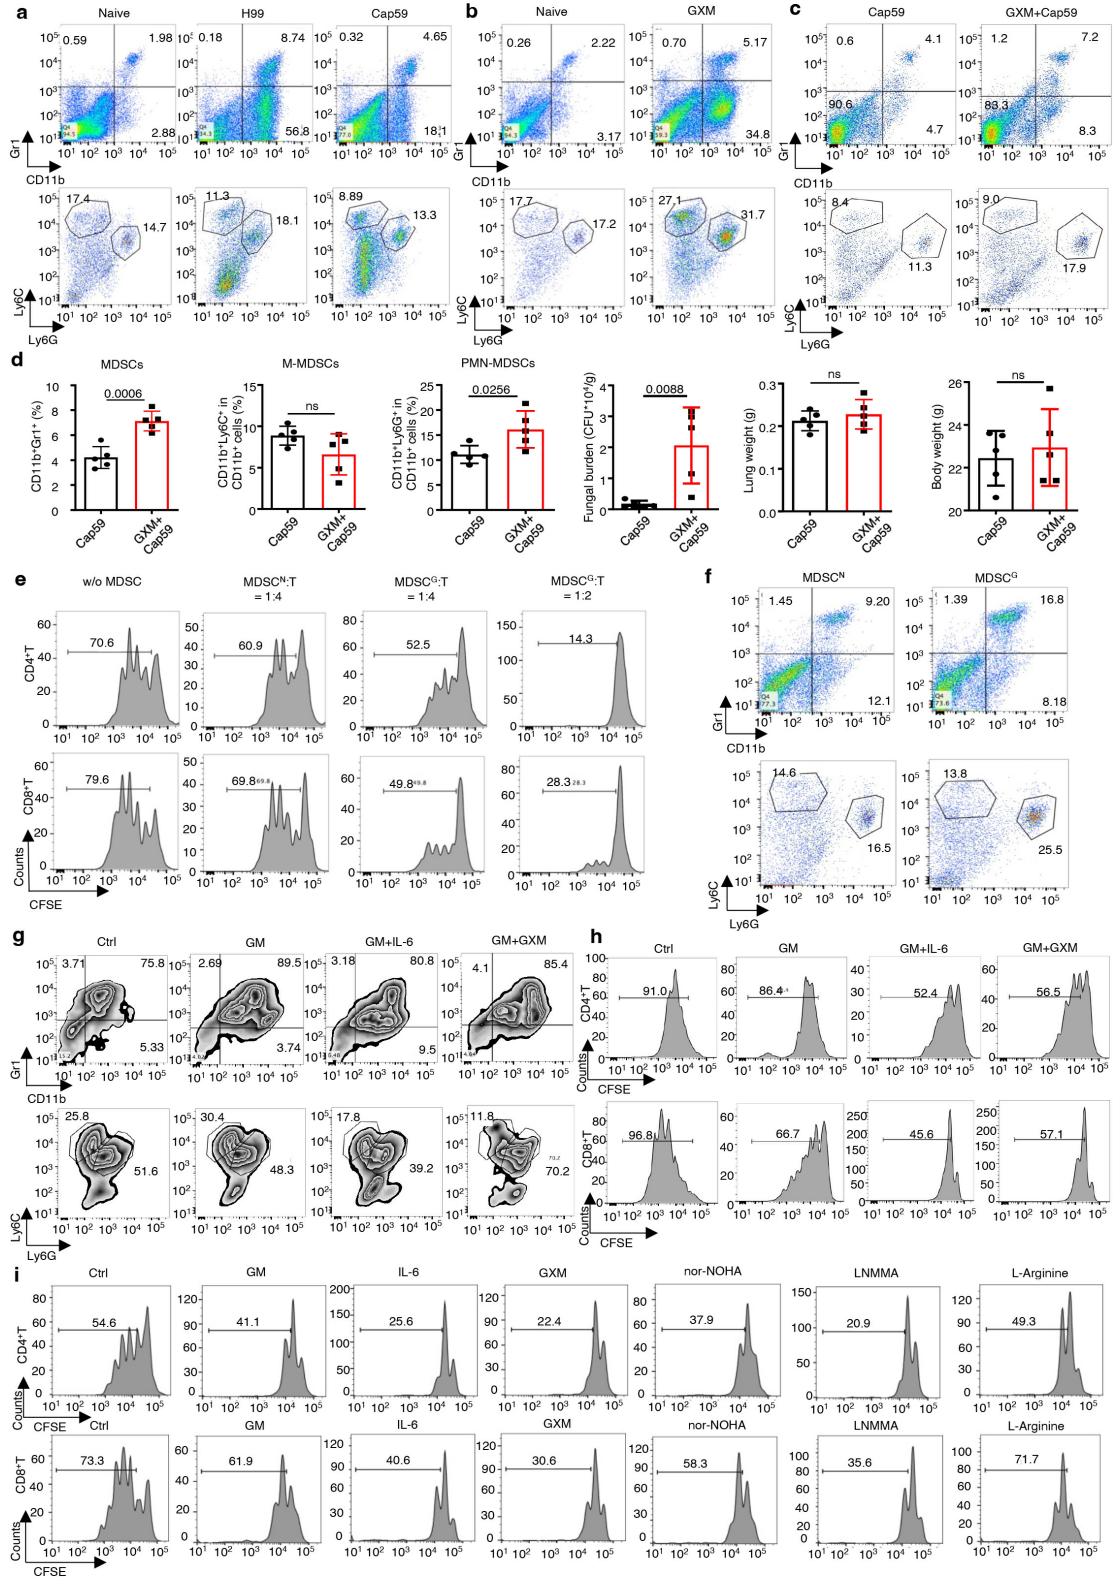

**Supplementary Figure 2. GXM induces the expansion and activation of MDSCs, especially PMN-MDSCs, for dampening T-cells and aggravating *C. neoformans* infection. (a) Representative flow charts of MDSCs, M-MDSCs or PMN-MDSCs in mice, which were intratracheally infected with a single exposure of *C. neoformans***

encapsulated strain H99 ( $1 \times 10^3$  CFU/mouse) or hypocapsular strain *cap59Δ* mutant (Cap59,  $1 \times 10^5$  CFU/mouse) for 14 days, **related to Fig 2a. (b)** Representative flow charts of MDSCs, M-MDSCs or PMN-MDSCs in mice treated without or with GXM (100  $\mu$ g/mouse twice a week) for 14 days, **related to Fig 2c. (c, d)** Representative flow charts of MDSCs, M-MDSCs or PMN-MDSCs **(c)** and the percentage of MDSCs, M-MDSCs or PMN-MDSCs, fungal burden, lung weight and body weight **(d)** in mice exposed to *cap59Δ* strain ( $1 \times 10^5$  CFU/mice) without (Cap59) and with pretreatment of GXM (100  $\mu$ g/mouse twice a week for two weeks) indicated as Cap59+GXM. **(e)** Representative flow charts of CD4<sup>+</sup> or CD8<sup>+</sup> T cell proliferation, which were co-cultured without (w/o) or with PMN sorted from PBS-treated mice (MDSC<sup>N</sup>) or MDSCs sorted from GXM-treated mice (MDSC<sup>G</sup>), **related to Fig 2e. (f)** Representative flow charts of MDSCs, M-MDSCs, PMN-MDSCs of Cap59-infected wild-type mice (WT) for 14 days, which are adoptively transferred with MDSC<sup>N</sup> or MDSC<sup>G</sup>, **related to Fig 2g. (g)** Representative flow charts of bone marrow (BM)-derived MDSCs, M-MDSCs and PMN-MDSCs, which were induced by medium (Ctrl), GM-CSF (GM, 40 ng/ml), GM-CSF+IL-6 (40 ng/ml) or GM-CSF+GXM (10  $\mu$ g/well) for 5 days, **related to Fig 2j. (h)** Representative results of CD4<sup>+</sup> or CD8<sup>+</sup> T cell proliferation ratio, which were co-cultured for 72h without (w/o) or with BM-derived MDSCs generated as described in **(g)**, **related to Fig 2l. (i)** Examples of flow charts showing proliferation frequency of CD4<sup>+</sup> or CD8<sup>+</sup> T cells, which were pretreated with nitric oxide synthase inhibitor L-NMMA, arginase inhibitor nor-NOHA, or L-arginine and then co-cultured for 72h with BM-MDSCs generated by GM + GXM as described in **(g)**, **related to Fig 2m.** Data were presented as mean  $\pm$  SEM, n=5(d) biologically independent samples. Data were analyzed by unpaired two-sided Student's t test. Source data are provided as a Source Data file.



Supplementary Figure 3

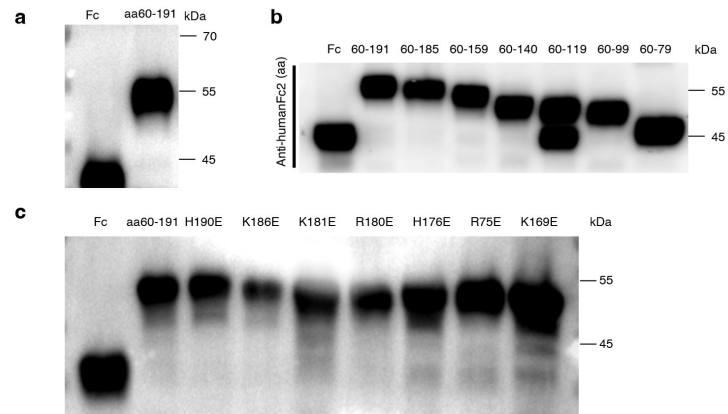

**Supplementary Figure 3. CLEC2D specifically recognizes GXM from *C. neoformans*.**

(a-c) Representative blots of expression verification for full length (a), truncated (b) or mutant (c) human CLEC2DCTLD (C-type lectin-like domain) in fusion with human IgG1-Fc peptides by anti-humanFc. Representative blots were shown by three independent experiments. Source data are provided as a Source Data file.

Supplementary Figure 4

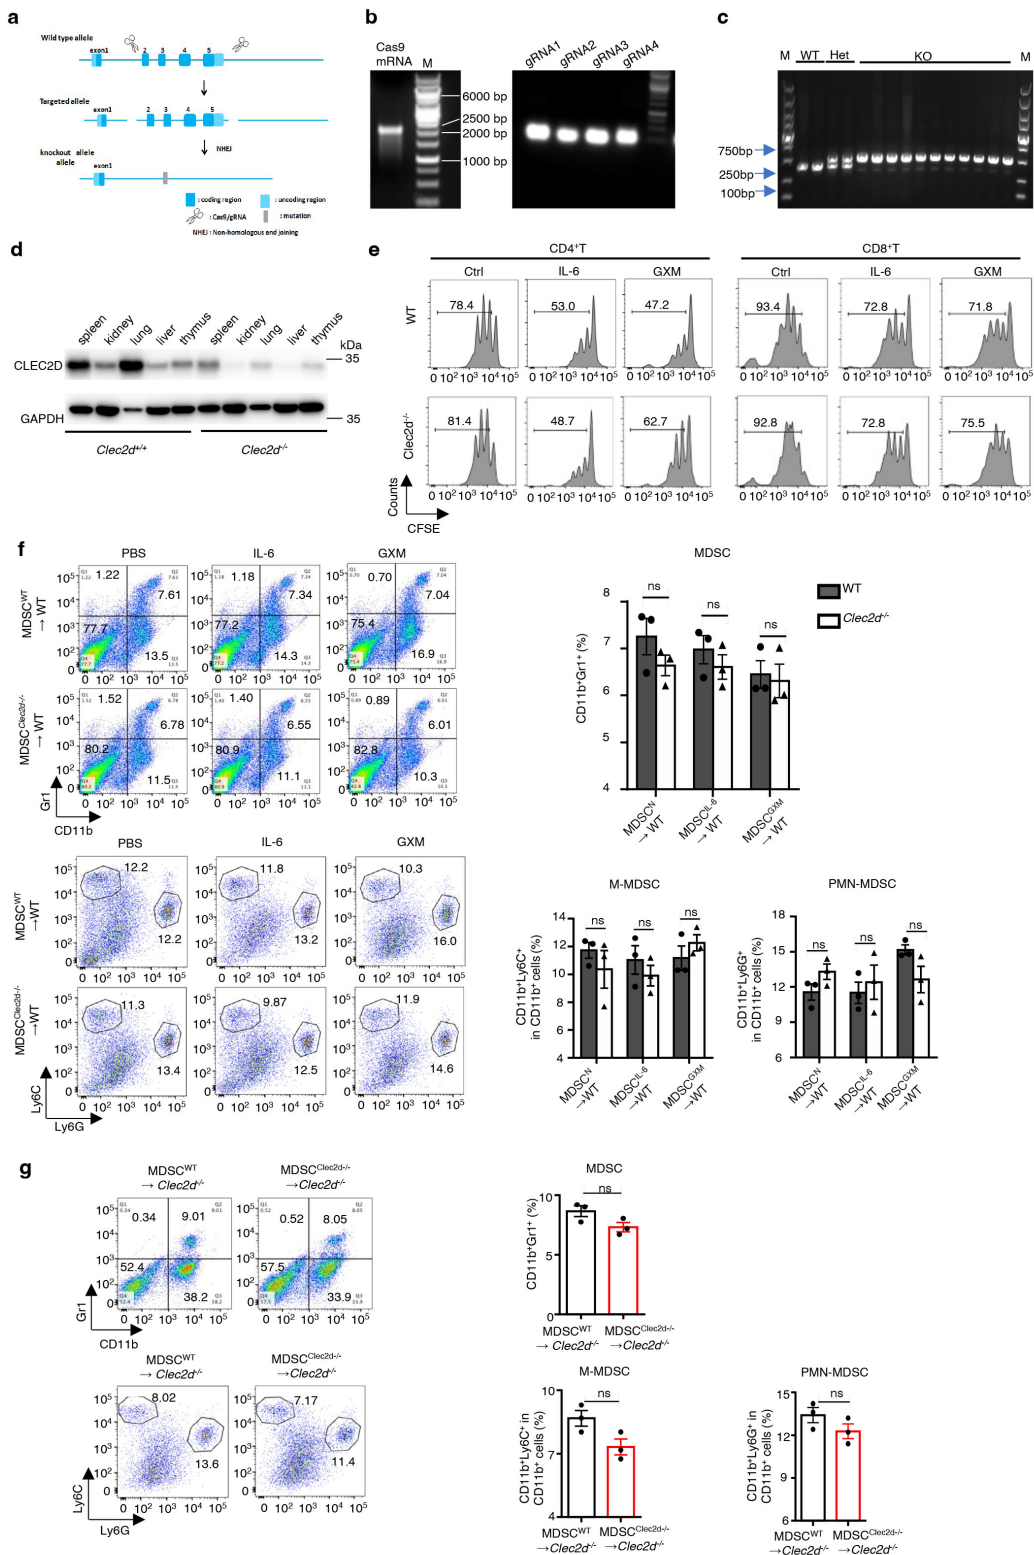

**Supplementary Figure 4. *Clec2d* deficiency impairs MDSC activation to alleviate *C. neoformans* infection. (a)** The design strategy of constructing *Clec2d* knockout mice. **(b)** Electrophoresis images of *Cas9* mRNA and gRNAs obtained by *in vitro* transcription. **(c)** Agarose gel images showing PCR products of genome of WT,

heterozygous (Het) and homozygous (KO) *Clec2d* mutant mice. *Clec2d*<sup>-/-</sup> mice were verified by PCR before each experiment and representative gels were shown. **(d)** Plots showing *Clec2d* expression in different organs of WT or *Clec2d*-deficient mice with GAPDH as a loading control. Representative blots of three independent experiments were shown. **(e)** Representative flow charts showing proliferation frequency of CD4<sup>+</sup> or CD8<sup>+</sup> T cells cocultured for 72h with wild-type or *Clec2d*-deficient BM-derived MDSCs, which were generated with GM-CSF (GM, 40 ng/ml, MDSC<sup>N</sup>), GM+IL-6 (40 ng/ml, MDSC<sup>IL-6</sup>) or GM+GXM (10 µg/well, MDSC<sup>GXM</sup>) for 5 days, related to Fig 4e. **(f)** The percentage of MDSCs, M-/PMN-MDSCs in lungs of Cap59-infected mice (1×10<sup>3</sup> CFU/mouse), which are adoptively transferred with MDSC<sup>N</sup>, MDSC<sup>IL-6</sup> or MDSC<sup>GXM</sup>. Representative flow charts were shown in the left panel. **(g)** The frequency of MDSCs, M-/PMN-MDSCs in lungs of H99-infected *Clec2d*<sup>-/-</sup> mice (1×10<sup>3</sup> CFU/mouse), which are adoptively transferred with MDSC<sup>WT</sup> and MDSC<sup>Clec2d<sup>-/-</sup></sup> (1×10<sup>6</sup> cells/mouse) generated by GM (40 ng/ml) + GXM (10 µg/well). Representative flow charts were shown in the left panel. Data were presented as mean ± SEM, n=3 biologically independent samples **(f, g)**. Data were analyzed by unpaired two-sided Student's t test in **f, g**. Source data are provided as a Source Data file.

Supplementary Figure 5

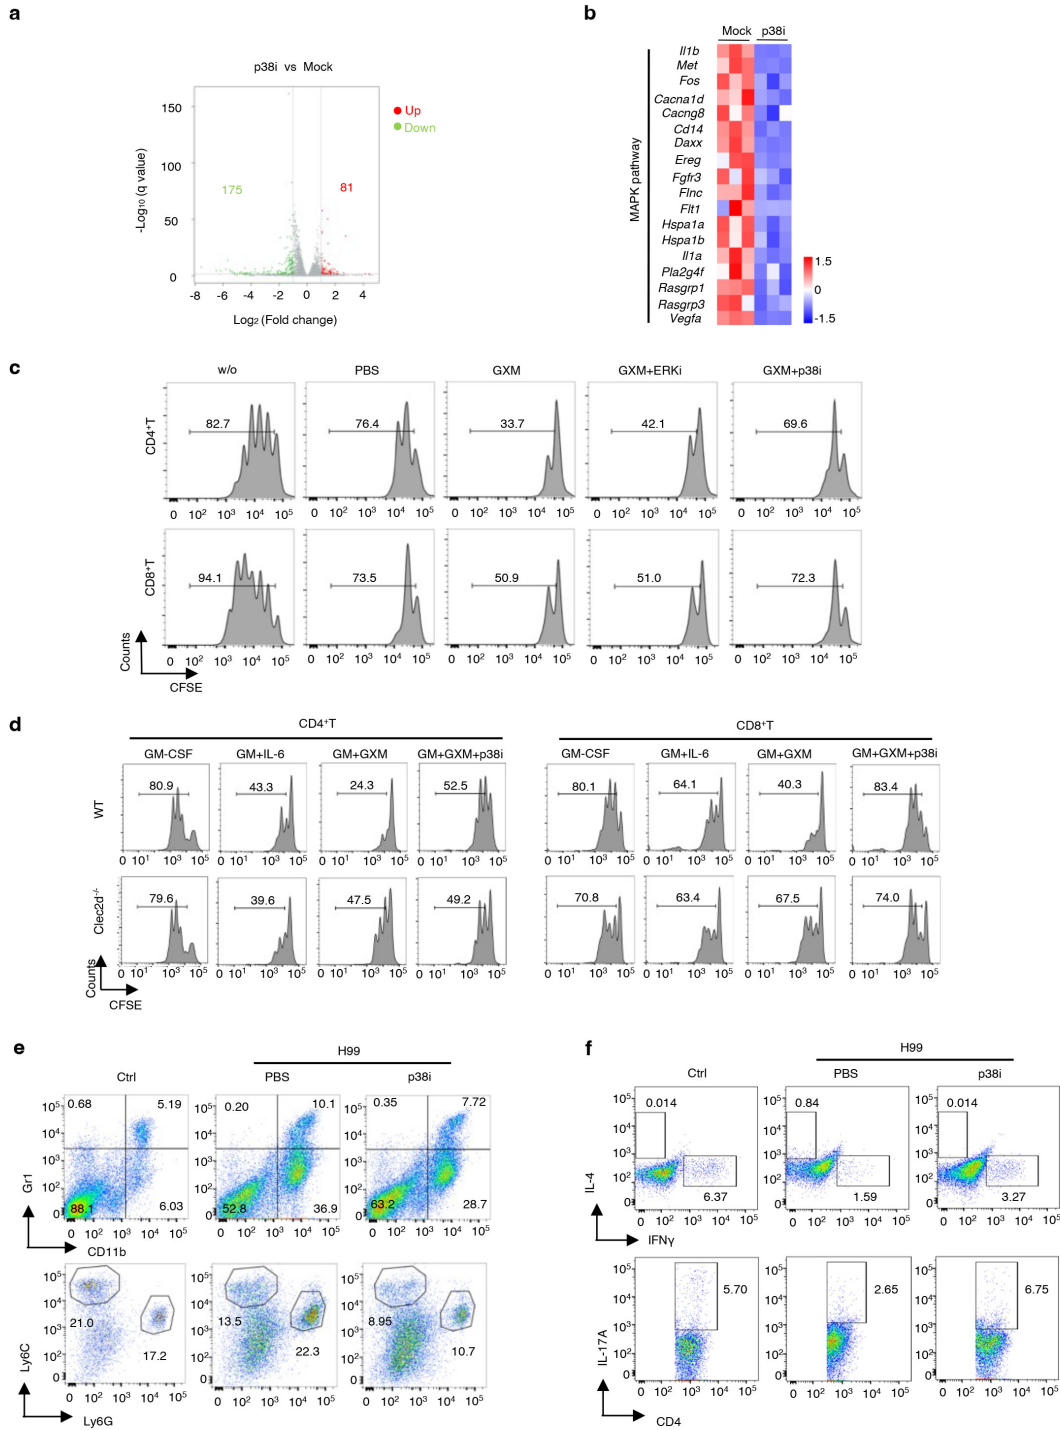

**Supplementary Figure 5. Inhibiting p38 activation is an effective immunotherapy against *C. neoformans* infection. (a)** 175 downregulated (green) and 81 upregulated genes (red) in BM-derived MDSCs from wild-type mice, which were generated by GM-CSF (40 ng/ml) + GXM (10  $\mu$ g/well) for 5 days and then treated with GXM (10  $\mu$ g/well) and SB202109 (p38i, 10  $\mu$ M) for 3h were shown in Volcano plot, with differential expression based on absolute fold change  $>2$  and FDR  $< 0.05$ . **(b)** Heatmap showing



the expression of genes involved in MAPK signaling pathway of Mock and p38i group, indicated in **(a)**. **(c)** Representative flow charts showing proliferation of CD4<sup>+</sup> or CD8<sup>+</sup> T cells cocultured with MSC-2, which were untreated (w/o) or treated with PBS, GXM (10 µg/well), GXM+ SB202190 (GXM + p38i, 10 µM) or GXM + U0126 (GXM + Erki, 10 µM) for 6h, **related to Fig 5f**. **(d)** Representative flow charts of proliferation of CD4<sup>+</sup> and CD8<sup>+</sup> T cells co-cultured with wild-type or *Clec2d*<sup>-/-</sup> BM-derived MDSCs, which were generated with GM-CSF (40 ng/ml), GM-CSF+IL-6 (GM+IL-6, 40 ng/ml), GM-CSF+GXM (GM+GXM, 10 µg/well) or GM-CSF+GXM+SB202190 (GM+GXM+p38i, 10 µM) for 5 days, **related to Fig 5g**. **(e, f)** Representative flow charts of MDSCs, M-MDSCs, PMN-MDSCs **(e)**, and IFN $\gamma$ <sup>+</sup> Th1 and IL-17A<sup>+</sup> Th17 **(f)** in the lungs of H99-infected mice (1 $\times$ 10<sup>3</sup> CFU/mouse) on Day 14, which were intraperitoneally treated without (PBS) or with p38 inhibitor SB202190 (p38i, 25 µg/kg every other day), **related to Fig 5k, 5m respectively**. Source data are provided as a Source Data file.

Supplementary Figure 6

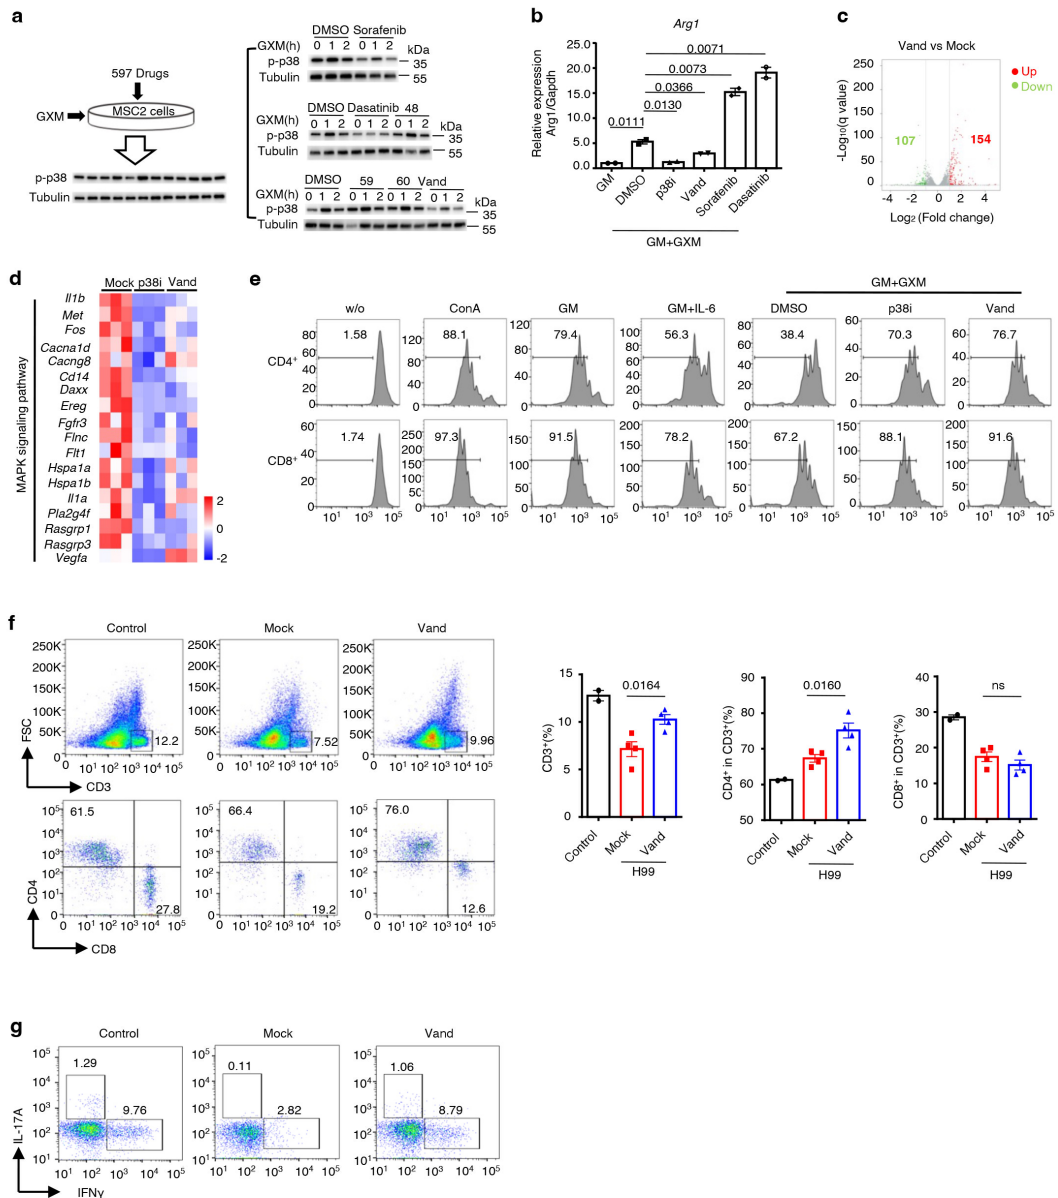

**Supplementary Figure 6. Vandetanib treatment restrains cryptococcal infection by impairing GXM-induced p38 activation and Arg1 production in MDSC.** (a-b) Screening for drugs which block MDSC suppressive activity. (a) Schematic graph showed that 597 drugs were screened for inhibiting GXM-induced p38 phosphorylation with MSC2 cell line and sorafenib, dasatinib and vandetanib were found. Representative blots were shown for three independent experiments. (b) Relative mRNA level of *Arg1* was measured in wild-type BM-derived MDSCs, which were generated by GM-CSF (40 ng/ml), GM-CSF+GXM (GM+GXM, 10  $\mu$ g/well), GM-CSF+GXM+SB202190 (p38i, 10  $\mu$ M), GM-CSF+GXM+vandetanib (Vand, 2  $\mu$ M), GM-CSF+GXM+ sorafenib

(sorafenib, 2  $\mu$ M), GM-CSF+GXM+ dasatinib (dasatinib, 2  $\mu$ M) for 5 days. **(c)** 154 up-regulated (red) and 107 down-regulated (green) genes in vandetanib-treated (Vand, 5  $\mu$ M) BM-derived MDSCs, which were generated by GM-CSF (40 ng/ml) + GXM (10  $\mu$ g/well) for 5 days and then treated with GXM (10  $\mu$ g/well) for 3h were shown in volcano plot. And differentially expressed genes were identified based on absolute fold change  $>2$  and FDR  $< 0.05$ . **(d)** Heatmap showing expression of MAPK signaling pathway-involved genes in wild-type BM-derived MDSCs, which were generated by GM-CSF (GM, 40 ng/ml) + GXM (10  $\mu$ g/well) and then treated with GXM (10  $\mu$ g/well) combined with p38 inhibitor SB202190 (p38i, 10  $\mu$ M) or vandetanib (Vand, 5  $\mu$ M) for 3h. **(e)** Representative histograms of proliferation frequency of CD4<sup>+</sup> and CD8<sup>+</sup> T cells, co-cultured with wild-type BM-derived MDSCs, which were generated with GM-CSF (GM, 40 ng/ml), GM-CSF+IL-6 (GM+IL-6, 40 ng/ml), GM-CSF+GXM (GM+GXM, 10  $\mu$ g/well), GM-CSF+GXM+SB202190 (p38i, 10  $\mu$ M) or GM-CSF+GXM+vandetanib (Vand, 2  $\mu$ M) for 5 days, **related to Fig 6e**. **(f)** Percentage of CD3<sup>+</sup> T cell, CD4<sup>+</sup> and CD8<sup>+</sup> in CD3<sup>+</sup> T cell of lung in H99-infected mice ( $1 \times 10^3$  CFU/mouse), which were intraperitoneally treated without (Mock) or with vandetanib (Vand, 50 mg/kg every other day). Representative charts were shown in the left panel. **(g)** Representative graphs of pulmonary IFN $\gamma$ <sup>+</sup> T<sub>H</sub>1 and IL-17A<sup>+</sup> T<sub>H</sub>17 cells in H99-infected mice ( $1 \times 10^3$  CFU/mouse) without (Mock) or with treatment of vandetanib (Vand, 50 mg/kg every other day), **related to Fig 6j**. Data were presented as mean  $\pm$  SEM, n=3 **(b)**, n=4 **(f)** biologically independent samples. Data were analyzed by unpaired two-sided Student's t test in **b, f**. Source data are provided as a Source Data file.

**Supplementary Table 1 Characteristics of patients in Pulmonary Cryptococcosis and Cryptococcal Meningitis study groups**

| Parameter                                               | Healthy Control | Pulmonary Cryptococcosis* | Cryptococcal Meningitis |
|---------------------------------------------------------|-----------------|---------------------------|-------------------------|
| n                                                       | 6               | 15                        | 14                      |
| Sex                                                     |                 |                           |                         |
| Male (n)                                                | 2               | 10                        | 8                       |
| Female (n)                                              | 4               | 5                         | 6                       |
| Age in years (mean, range)                              | 28.0, 24-33     | 55.0, 39-59               | 58.0, 48-70             |
| Latex agglutination test                                | -               | 1, 0-80                   | 20480, 2560-40960       |
| Immune cell types (mean ± SEM)                          |                 |                           |                         |
| WBC ( $\times 10^9/L$ )                                 | 5.3 ± 0.5       | 5.6 ± 2.1                 | 9.0 ± 3.9               |
| Lymphocytes %                                           | 24.8 ± 7.1      | 25.4 ± 8.1                | 14.4 ± 8.1              |
| Neutrophils %                                           | 58.2 ± 8.2      | 62.7 ± 12.8               | 72.5 ± 22.3             |
| Eosinophils %                                           | 1.7 ± 0.5       | 1.7 ± 1.3                 | 1.0 ± 0.9               |
| Monocyte %                                              | 8.3 ± 3.9       | 8.6 ± 4.8                 | 6.4 ± 2.2               |
| Underlying conditions <sup>†</sup>                      |                 | 46.7% (7/15)              | 64.3% (9/14)            |
| Auto immune disease                                     | -               | 26.7% (4/15)              | 28.6% (4/14)            |
| Type II diabetes mellitus                               | -               | 20.0% (3/15)              | 21.4% (3/14)            |
| Administration of glucocorticoids or immunosuppressants | -               | 13.3% (2/15)              | 21.4% (3/14)            |
| Renal insufficiency                                     | -               | 6.7% (1/15)               | 14.3% (2/14)            |
| Liver cirrhosis                                         | -               | 13.3% (2/15)              | -                       |
| Solid organ tumor                                       | -               | -                         | 7.1% (1/14)             |
| Head trauma history                                     | -               | -                         | 7.1% (1/14)             |
| Hypophysis                                              | -               | -                         | 7.1% (1/14)             |

\*Six of 15 cases were diagnosed by pathological examination after operation, and the serum latex agglutination tests were negative.

<sup>†</sup>Two and five of pulmonary cryptococcosis and cryptococcal meningitis cases had more than 1 underlying conditions, respectively.



## Supplementary Table 2 Primers used in this study

| <b>Primer sequences for Clec2d knockout mice detection</b>  |                                              |
|-------------------------------------------------------------|----------------------------------------------|
| P1 F                                                        | TAACTCCTGTCCTCTAG                            |
| P2 R                                                        | ATATGGGAGCCACAACCTG                          |
| P3 R                                                        | GAGAACACCAATCTCAAAAAAC                       |
|                                                             |                                              |
| <b>Primer sequences for qPCR</b>                            |                                              |
| Mouse Arg-1 F                                               | AAGAATGGAAGAGTCAGTGTGG                       |
| Mouse Arg-1 R                                               | GGGAGTGTTGATGTCAGTGTG                        |
| Mouse inos F                                                | GAAGTGTAGCACAGCACAGGAAAT                     |
| Mouse inos R                                                | CGTACCGGATGAGCTGTGAAT                        |
| Mouse Clec2d F                                              | GGTTTGACAACCAGGATGAGC                        |
| Mouse Clec2d R                                              | TCTCCCCGGATGGGAATCG                          |
| Mouse Cd69 F                                                | AGGCTTGTACGAGAAGTTGGA                        |
| Mouse Cd69 R                                                | AGTTCACCAGAATATCGCTTCAG                      |
| Mouse Mincle F                                              | AGTGCTCTCCTGGACGATAG                         |
| Mouse Mincle R                                              | CCTGATGCCTCACTGTAGCAG                        |
| Mouse Gapdh F                                               | TGGCCTCCGTGTTCCCTAC                          |
| Mouse Gapdh R                                               | GAGTTGCTGTTGAAGTCGCA                         |
| Human Clec2d F                                              | AGTCTTGCACTTGTCACGAATTCGAGAGCTAACTGCCATCAAGA |
| Human Clec2d R                                              | GCATGTGTGAGTTTTGTCAGATCTGACATGTATATCTGATTTGG |
| <b>Primer sequences for Clec2d knockout mice generation</b> |                                              |
| sgRNA 1                                                     | GTCCTAGCCAGTCTATTCTTAGG                      |
| sgRNA 2                                                     | TCCTAGCCAGTCTATTCTTAGGG                      |
| sgRNA 3                                                     | GATCAGCAGTGCCAATAAAAGGG                      |
| sgRNA 4                                                     | GCTTACTGTGAGTGGTGATGTGG                      |

### Supplementary Table 3 Reagents used in this study

| REAGENT or RESOURCE                              | SOURCE                    | IDENTIFIER     |
|--------------------------------------------------|---------------------------|----------------|
| <b>Antibodies</b>                                |                           |                |
| <b>For Flow cytometry</b>                        |                           |                |
| PerCP-Cy5.5 -anti-mouse CD11b (M1/70)            | BD Pharmingen             | 561114         |
| APC-anti-mouse Gr1(RB6-8C5)                      | BD Pharmingen             | 553129         |
| BV421-anti-mouse Ly-6G (1A8)                     | Biolegend                 | 127628         |
| FITC-anti-mouse Ly-6G (1A8)                      | eBioscience               | 11-9668-82     |
| PE- anti-mouse Ly6C (HK1.4)                      | Biolegend                 | 128008         |
| APC-anti-mouse CD8 (53-6.7)                      | Biolegend                 | 100712         |
| BV421-anti-mouse CD4 (GK1.5)                     | Biolegend                 | 100438         |
| APC-anti-mouse IFN $\gamma$ (XMG1.2)             | Biolegend                 | 505810         |
| PE-anti-mouse IL-17A (ebio17B7)                  | Biolegend                 | 559502         |
| Alexa Fluor 594- anti-mouse IgG                  | abcam                     | ab150116       |
| FITC-anti-human Fc fragment                      | Jackson Immuno Research   | 109-007-008    |
| <b>For western blot</b>                          |                           |                |
| phospho-p38                                      | Cell Signaling Technology | 4511S          |
| p38                                              | Cell Signaling Technology | 8690S          |
| phospho-ERK                                      | Cell Signaling Technology | 4370S          |
| ERK                                              | Cell Signaling Technology | 4695S          |
| GAPDH                                            | Cell Signaling Technology | 5174S          |
| phospho-p38                                      | Cell Signaling Technology | 4511S          |
| p38                                              | Cell Signaling Technology | 8690S          |
| <b>For Neutralization</b>                        |                           |                |
| Anti-mouse Ly6G (1A8)                            | BioX Cell                 | BE0075         |
| Anti-mouse DR5 (MD5-1)                           | BioX Cell                 | BE0161         |
| Rat IgG1 isotype control (TNP6A7)                | BioX Cell                 | BP0290         |
| <b>inhibitors</b>                                |                           |                |
| SB202190                                         | MCE                       | HY-10295       |
| U0126-Etoh                                       | Selleck                   | S1102          |
| <b>Experimental Models: Organisms/Strains</b>    |                           |                |
| C57BL/6 wild-type mice                           | Charles River, China      | 213            |
| <i>Clec2d</i> <sup>-/-</sup> mice                | This study                | N/A            |
| <i>C. neoformans serotype A</i> (H99)            | Jia's lab                 | N/A            |
| <i>C. neoformans serotype A mutation</i> (Cap59) | Jia's lab                 | N/A            |
| <b>Primers</b>                                   |                           |                |
| See Table S1                                     | This study                | Table S1       |
| <b>Recombinant DNA</b>                           |                           |                |
| Plasmid: pFuse-hIgG1-Fc                          | InvivoGen                 | pFuse-hIgG1-Fc |
| <b>Chemicals, Peptides, and Recombinant</b>      |                           |                |

| <b>Proteins</b>                                              |                          |                                                                                  |
|--------------------------------------------------------------|--------------------------|----------------------------------------------------------------------------------|
| Collagenase type II                                          | Serva                    | 17454                                                                            |
| Dulbecco's modified Eagle's medium and Nutrient Mixture F-12 | Thermo Fisher Scientific | 11320-082                                                                        |
| Fetal bovine serum                                           | Thermo Fisher Scientific | 10091148                                                                         |
| Penicillin/streptomycin                                      | Thermo Fisher Scientific | 15140-122                                                                        |
| Pentobarbital sodium salt                                    | Merk                     | 1063180500                                                                       |
| Gentamicin                                                   | MCE                      | HY-A0276                                                                         |
| Triton X-100                                                 | Sigma                    | X100                                                                             |
| 0.05% Trypsin-EDTA                                           | Thermo Fisher Scientific | 25300062                                                                         |
| Lipofectamine® 3000 Transfection Reagent                     | Thermo Fisher Scientific | L3000008                                                                         |
| Dulbecco's Modified Eagle's Medium                           | Thermo Fisher Scientific | 11965-092                                                                        |
| dialysis membranes 7000D                                     | Solarbio                 | YA1082-5M                                                                        |
| polyethylene glycol-2000                                     | Sangon Biotech           | A601785-0500                                                                     |
| Opti-MEM                                                     | Thermo Fisher Scientific | 31985070                                                                         |
| Lipofectamine® RNAiMAX Transfection Reagent                  | Thermo Fisher Scientific | 13778075                                                                         |
| TRIzol                                                       | Thermo Fisher Scientific | 10296010                                                                         |
| Cell lysis buffer for Western                                | Beyotime                 | P0013J                                                                           |
| RIPA buffer                                                  | Beyotim                  | P0013C                                                                           |
| <b>Critical Commercial Assays</b>                            |                          |                                                                                  |
| RNeasy Micro Kit                                             | Qiagen                   | 74004                                                                            |
| Fast Site-Directed Mutagenesis Kit                           | TIANGEN                  | KM101                                                                            |
| FastQuant RT Kit (With gDNase)                               | TIANGEN                  | KR106-02                                                                         |
| SuperReal PreMix Plus (SYBR Green)                           | TIANGEN                  | FP205-02                                                                         |
| LEGEND MAX™ Mouse GM-CSF ELISA Kit                           | Biolegend                | 439807                                                                           |
| <b>Software and Algorithms</b>                               |                          |                                                                                  |
| Feature Extraction software version10.7.1.1                  | Agilent                  | N/A                                                                              |
| Genespring version13.1                                       | Agilent                  | N/A                                                                              |
| gel imaging system Tanon 5500                                | Tanon                    |                                                                                  |
| GraphPad prism 8                                             | GraphPad                 | <a href="http://www.graphpad.com">http://www.graphpad.com</a><br>RRID:SCR_002798 |
| FlowJo software version V10                                  | Tree Star                | N/A                                                                              |
